# Supplementary material for: Association Between Life Purpose and Mortality Among US Adults Older Than 50 Years
Source: PubMed Central journal article supplement (PMC6632139; doi:10.1001/jamanetworkopen.2019.4270), 2019-05-24
Supplement: jamanetwopen-2-e194270-s001.pdf [file jamanetwopen-2-e194270-s001.pdf]

## Supplementary Online Content

Alimujiang A, Wiensch A, Boss J, et al. Association between life purpose and mortality among US adults older than 50 years. *JAMA Netw Open*. 2019;2(5):e194270. doi:10.1001/jamanetworkopen.2019.4270

### **eAppendix.** Methods

**eFigure.** 2006–2010 Health and Retirement Study Data Cleaning Flowchart

**eTable 1.** Descriptive Statistics for Psychological Factors for the 2006–2010 Health and Retirement Study (N=6,985)

**eTable 2.** Descriptive Characteristics of the 944 Health and Retirement Study Participants With Incomplete Life Purpose Questionnaire Who Were Not Lost-to-Follow-up or Missing Covariate Data

This supplementary material has been provided by the authors to give readers additional information about their work.

## **eAppendix. Methods**

### **HRS Study Design**

HRS cohort enrichment was carried out in 1993 (the Asset and Health Dynamics of the Oldest Old Cohort (AHEAD)), 1998 (Children of the Depression Cohort (CODA) and War Baby), 2004 (The Early Baby Boomers Cohort (EBB)) and 2010 (The Mid Baby Boomers Cohort (MBB) and Minority oversample) to enroll more birth cohorts (22). Face-to-face interviews are conducted every two years to collect information on participants' health, economics, demographics, and the retirement process; the data are publicly available (22, 23). HRS used a stratified, multistage area probability design, in which Blacks, Hispanics, and Floridians were oversampled (22, 23) and we accounted for the sampling weights in our analyses.

### **Covariate Coding**

Smoking status was determined as never, current smoker, or former smoker. Individuals who reported being a smoker on previous questionnaires, but did not answer the question on the 2006 questionnaire, were placed into a separate "smoker, but current status unknown" category to prevent them from being excluded from the analysis. The functional status score was calculated by summation of five activities of daily living (bathing, eating, dressing, walking across a room, and getting in or out of bed). A higher score indicated weaker functioning (continuous). Physical activity was assessed based on the reported frequency of vigorous activity (such as running or jogging, swimming, cycling, aerobics or gym workout, tennis, or digging with a spade or shovel) and categorized as 1) every day; 2) more than once a week; 3) once a week; 4) one to three times a month; 5) hardly ever or never. Alcohol consumption was measured based on two questions "Do you ever drink any alcoholic beverages such as beer, wine, or liquor?" and "If yes, in the last three months, on average, how many days per week have you had any alcohol to drink?" We further divided alcohol consumption into 1) non-drinkers 2) drink 1-2 days per week, 3) drink 3-4 days per week, 4) drink 5-6 days per week, and 5) drink everyday. BMI was calculated using self-reported weight and height, and categorized according to the recommendations of the World Health Organization (27): below-normal weight (<18.5 kg/m<sup>2</sup>), normal range (18.5–24.9 kg/m<sup>2</sup>), overweight (25.0–29.9 kg/m<sup>2</sup>), and obese (≥30.0 kg/m<sup>2</sup>).

**eFigure. 2006–2010 Health and Retirement Study Data Cleaning Flowchart**

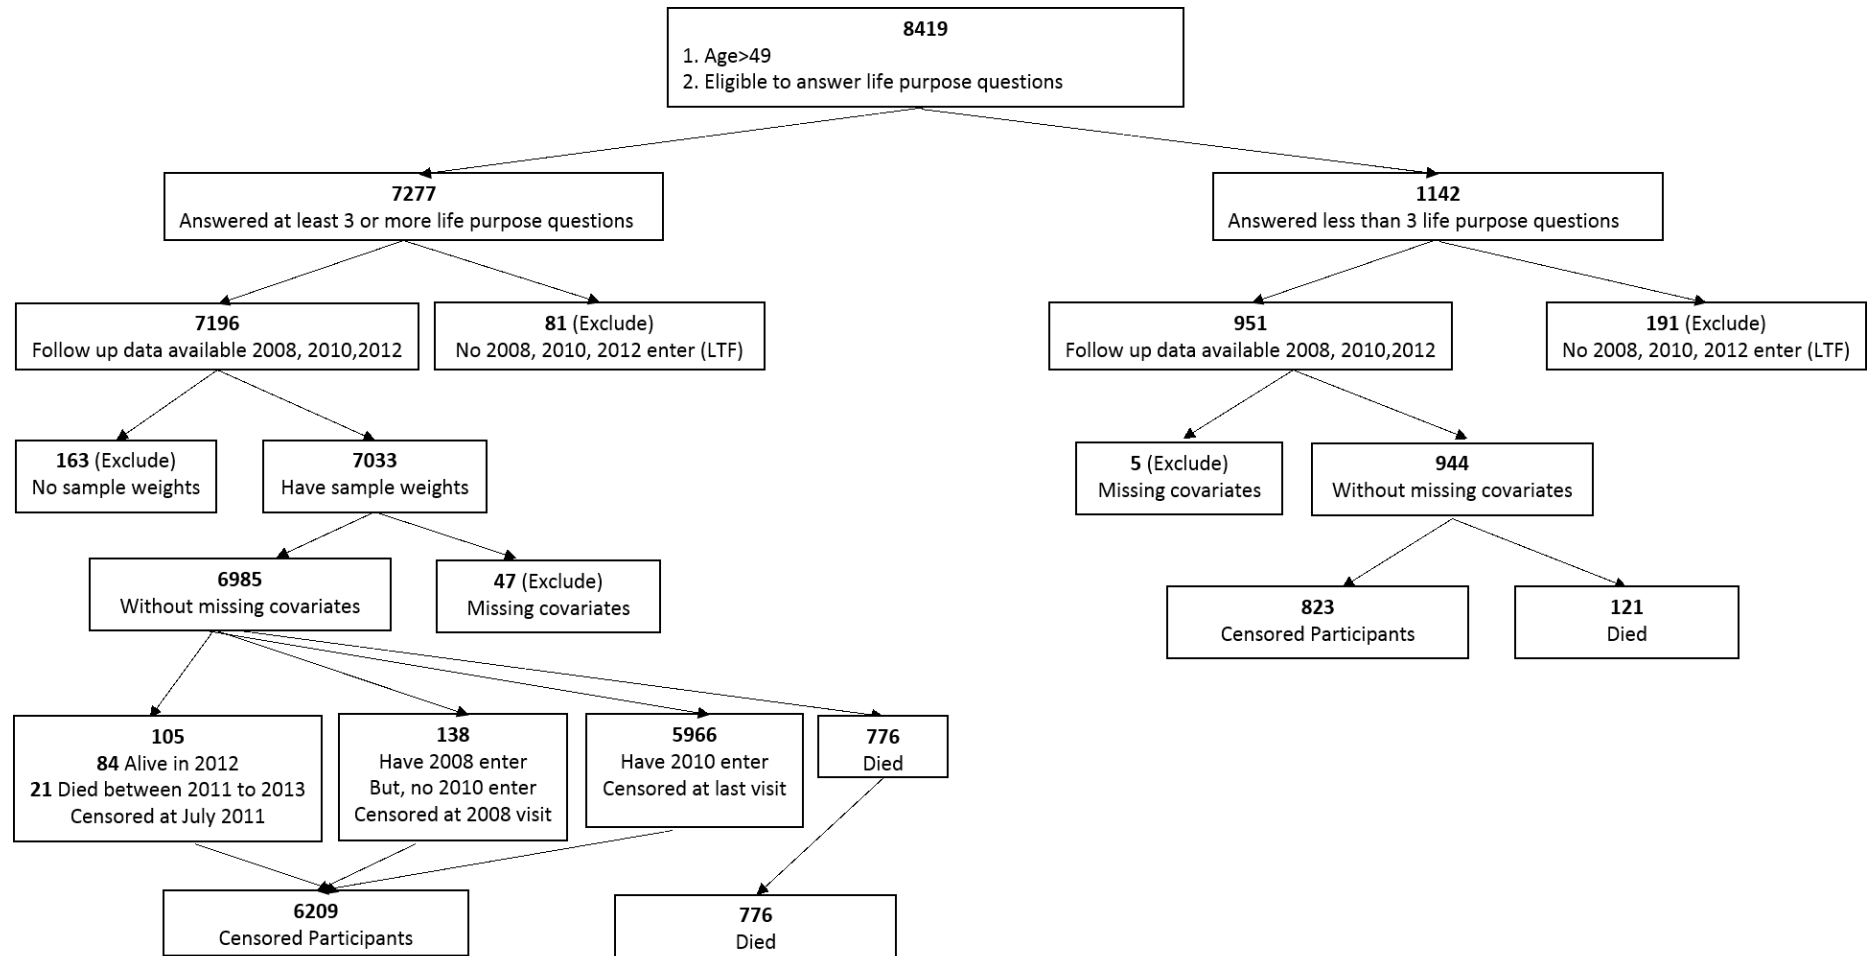

**eTable 1. Descriptive Statistics for Psychological Factors for the 2006–2010 Health and Retirement Study (N=6,985)**

| Psychological covariates | No Event<br>N=6209 |      |      | Death<br>N=776 |      |      | Cronbach alphas <sup>a</sup> |
|--------------------------|--------------------|------|------|----------------|------|------|------------------------------|
|                          | Range              | Mean | SD   | Range          | Mean | SD   |                              |
| Negative                 |                    |      |      |                |      |      |                              |
| Anxiety                  | 1-4                | 1.54 | 0.56 | 1-4            | 1.72 | 0.64 | 0.81                         |
| Cynical hostility        | 1-6                | 2.94 | 1.13 | 1-6            | 3.10 | 1.18 | 0.79                         |
| Depression               | 0-8                | 1.45 | 1.9  | 0-8            | 2.25 | 2.12 | 0.54                         |
| Negative affect          | 1-5                | 1.60 | 0.63 | 1-5            | 1.87 | 0.77 |                              |
| Positive                 |                    |      |      |                |      |      |                              |
| Optimism                 | 1-6                | 4.09 | 0.87 | 1-6            | 4.00 | 1.00 | 0.52                         |
| Positive affect          | 1-5                | 3.60 | 0.68 | 1-5            | 3.45 | 0.72 | 0.92                         |
| Social participation     | 0-8                | 4.19 | 1.66 | 0-8            | 3.07 | 1.69 | 0.87                         |

<sup>a</sup> Standardized alpha coefficient provides information about how each variable reflects the reliability of the scale with standardized variables.

**eTable 2. Descriptive Characteristics of the 944 Health and Retirement Study Participants With Incomplete Life Purpose Questionnaire who were not lost-to-follow-up or missing covariate data (see eFigure).**

| Measure                               | Total<br>(N=944) |            | No Event<br>(N=823) |            | Death<br>(N=121) |            |
|---------------------------------------|------------------|------------|---------------------|------------|------------------|------------|
|                                       | N                | Mean(SD)/% | N                   | Mean(SD)/% | N                | Mean(SD)/% |
| <b>Age</b>                            |                  |            |                     |            |                  |            |
| 50-54                                 | 126              | 13.35%     | 125                 | 15.19%     | 1                | 0.83%      |
| 55-59                                 | 148              | 15.68%     | 145                 | 17.62%     | 3                | 2.48%      |
| 60-64                                 | 110              | 11.65%     | 106                 | 12.88%     | 4                | 3.31%      |
| 65-69                                 | 143              | 15.15%     | 129                 | 15.67%     | 14               | 11.57%     |
| 70-74                                 | 120              | 12.71%     | 103                 | 12.52%     | 17               | 14.05%     |
| 75-79                                 | 84               | 8.90%      | 71                  | 8.63%      | 13               | 10.74%     |
| ≥80                                   | 213              | 22.56%     | 144                 | 17.50%     | 69               | 57.02%     |
| <b>Sex</b>                            |                  |            |                     |            |                  |            |
| Male                                  | 397              | 42.06%     | 342                 | 41.56%     | 55               | 45.45%     |
| Female                                | 547              | 57.94%     | 481                 | 58.44%     | 66               | 54.55%     |
| <b>Marital status</b>                 |                  |            |                     |            |                  |            |
| Married                               | 503              | 53.28%     | 458                 | 55.65%     | 45               | 37.19%     |
| Separated/Divorced                    | 143              | 15.15%     | 132                 | 16.04%     | 11               | 9.09%      |
| Widowed                               | 266              | 28.18%     | 205                 | 24.91%     | 61               | 50.41%     |
| Never Married                         | 32               | 3.39%      | 28                  | 3.40%      | 4                | 3.31%      |
| <b>Race/ethnicity</b>                 |                  |            |                     |            |                  |            |
| Non-Hispanic White                    | 546              | 57.84%     | 469                 | 56.99%     | 77               | 63.64%     |
| Non-Hispanic and Hispanic Black       | 252              | 26.69%     | 222                 | 26.97%     | 30               | 24.79%     |
| Hispanic White                        | 73               | 7.73%      | 66                  | 8.02%      | 7                | 5.79%      |
| Other                                 | 73               | 7.73%      | 66                  | 8.02%      | 7                | 5.79%      |
| <b>Education level</b>                |                  |            |                     |            |                  |            |
| <High school                          | 361              | 38.24%     | 309                 | 37.55%     | 52               | 42.98%     |
| High school                           | 385              | 40.78%     | 330                 | 40.10%     | 55               | 45.45%     |
| Some College                          | 34               | 3.60%      | 31                  | 3.77%      | 3                | 2.48%      |
| College                               | 93               | 9.85%      | 86                  | 10.45%     | 7                | 5.79%      |
| Master or Professional degree         | 71               | 7.52%      | 67                  | 8.14%      | 4                | 3.31%      |
| <b>Smoking status</b>                 |                  |            |                     |            |                  |            |
| Never                                 | 401              | 42.48%     | 357                 | 43.38%     | 44               | 36.36%     |
| Current smoker                        | 162              | 17.16%     | 146                 | 17.74%     | 16               | 13.22%     |
| Former smoker                         | 377              | 39.94%     | 317                 | 38.52%     | 60               | 49.59%     |
| Smoker but don't know whether current | 4                | 0.42%      | 3                   | 0.36%      | 1                | 0.83%      |
| <b>Consume alcohol drinks/wk</b>      |                  |            |                     |            |                  |            |
| 0                                     | 660              | 69.92%     | 570                 | 69.26%     | 90               | 74.38%     |
| 1-2                                   | 133              | 14.09%     | 124                 | 15.07%     | 9                | 7.44%      |
| 3-4                                   | 56               | 5.93%      | 49                  | 5.95%      | 7                | 5.79%      |
| 5-6                                   | 32               | 3.39%      | 30                  | 3.65%      | 2                | 1.65%      |
| Everyday                              | 63               | 6.67%      | 50                  | 6.08%      | 13               | 10.74%     |
| <b>Vigorous physical activity</b>     |                  |            |                     |            |                  |            |
| Every day                             | 21               | 2.22%      | 20                  | 2.43%      | 1                | 0.83%      |
| More than once a week                 | 153              | 16.21%     | 147                 | 17.86%     | 6                | 4.96%      |
| Once a week                           | 57               | 6.04%      | 54                  | 6.56%      | 3                | 2.48%      |
| One to three times a month            | 36               | 3.81%      | 32                  | 3.89%      | 4                | 3.31%      |
| Hardly ever or never                  | 677              | 71.72%     | 570                 | 69.26%     | 107              | 88.43%     |
| <b>Functional status score</b>        | 944              | 0.54(1.21) | 823                 | 0.41(1.03) | 121              | 1.39(1.82) |

|                                    |     |            |     |            |     |            |
|------------------------------------|-----|------------|-----|------------|-----|------------|
| <b>Presence of Chronic Illness</b> |     |            |     |            |     |            |
| No                                 | 243 | 25.74%     | 226 | 27.46%     | 17  | 14.05%     |
| Yes                                | 701 | 74.26%     | 597 | 72.54%     | 104 | 85.95%     |
| <b>BMI<sup>a</sup></b>             |     |            |     |            |     |            |
| ≤18.50                             | 58  | 6.14%      | 50  | 6.08%      | 8   | 6.61%      |
| 18.51-24.99                        | 304 | 32.2%      | 249 | 30.26%     | 55  | 45.45%     |
| 25.00–29.99                        | 330 | 34.96%     | 296 | 35.97%     | 34  | 28.10%     |
| ≥30.00                             | 252 | 26.69%     | 228 | 27.70%     | 24  | 19.83%     |
| <b>Life purpose score</b>          | 944 | 3.95(0.33) | 823 | 3.95(0.33) | 121 | 3.94(0.37) |
| <b>Life purpose score category</b> |     |            |     |            |     |            |
| 1.00-2.99                          | 12  | 25.00%     | 10  | 23.81%     | 2   | 33.33%     |
| 3.00-3.99                          | 9   | 18.75%     | 8   | 19.05%     | 1   | 16.67%     |
| 4.00-4.99                          | 15  | 31.25%     | 14  | 33.33%     | 1   | 16.67%     |
| 5.00-5.99                          | 8   | 16.67%     | 7   | 16.67%     | 1   | 16.67%     |
| 6.00                               | 4   | 8.33%      | 3   | 7.14%      | 1   | 16.67%     |
| Missing                            | 896 |            | 781 |            | 115 |            |

<sup>a</sup>. BMI as weight in kilograms divided by the square of the height in meters, then categorized according to the recommendations of the World Health Organization: below-normal weight (<18.5 kg/m<sup>2</sup>), normal range (18.5–24.9 kg/m<sup>2</sup>), overweight (25.0–29.9 kg/m<sup>2</sup>), and obesity (≥30.0 kg/m<sup>2</sup>)

<sup>b</sup>. P-values obtained through chi-square test or Student's t-test.
